# Supplementary material
Source: MDPI journal article supplement (https://www.mdpi.com/2076-0760/6/1/7)
Supplement: s1 [file s1]

Supplementary Materials: Prisons as Panacea or Pariah? The Countervailing Consequences of the Prison Boom on the Political Economy of Rural Towns

John M. Eason

**Impact on Rural Towns across the Prison Boom**

*Estimating the Prison Impact in 1980*

Table 4 presents multivariate results estimating the impact of prison-building on the political economy of rural places in 1980, a date that should capture the effects of the first period of prison-building (1969–1978). In this and subsequent tables, I present only the coefficients for recent prison-building in each row of each table. Consider first the findings for median home values. The more conservative estimated increase of in home value from the fixed-effects analysis (Model 1) results in an increase of more in median home value. Controlling for U.S. Census place-level demography including total population, percent of residents residing in town from previous census, poverty, percent African-American, percent Latino, owner occupancy, and prison-building in prior periods, prison-building was associated with an increase of $2560 in median home value in 1980. Although this may seem like a nominal amount for a home value, adjusted for inflation into 2014 dollars this increase would be more than $7300. This is not a trivial amount in rural areas where poverty is higher and median family income is lower when compared to urban areas. Model 3 (propensity score) demonstrates an increase of $7615 in median home value on average for a town that built a prison between 1969 and 1978 compared to demographically similar towns that did not in 1980. Adjusting for inflation in 2014, this would be close to a $22,000 increase in median home value.

Models 1 and 3 also establish that prison-building before 1969 had a positive and statistically significant impact on median home values in 1980. Given that prison-building is not a random occurrence, the fixed-effects and propensity matching models provide a more rigorous test of selection. The smaller coefficient from the fixed-effects model highlights the importance of state-level variance in prison-building. In 1980, 80% of the variance in median home values could be accounted for by state-level differences.

Next, I consider median family income, controlling for total population, percent of adults above age 25 completing a bachelor’s degree, percent African-American, and percent Latino. Model 2 shows a statistically significant association between recent prison-building between 1969 and 1978 and an increase of over $1200 in median family income in Southern rural towns in 1980. The association and magnitude of this effect remains in the propensity score matching example in Model 4. Again, adjusting for inflation, an increase in median family income for the average prison town of roughly $1200 in 1980 equals more than $3400 in 2014.

Estimates of poverty are consistent with median family income and median home value. Overall, the impact of newly constructed prisons is not associated with poverty in 1980. However, after controlling for the prior decade’s poverty, percent African-American, and percent Latino, prison-building reduced poverty in rural Southern towns by around 2% on average across fixed-effects (Model 2) and propensity score matching models (Model 4). Prison-building prior to 1969 also had a positive and statistically significant association with median home values in 1980. This suggests that towns most likely to build prior to the prison boom were on a downward economic trajectory.

Unemployment is the final outcome considered. I control for total population, prior decade’s unemployment, percent African-American, and percent Latino across all models in this table. The fixed-effects model (Models 1 and 2) shows no statistically significant relationship between prison-building and unemployment in this period. The propensity scores (Model 4) show a statistically significant estimate of prison-building producing a small, negative unemployment outcome for towns. Prior research shows that there is a large, positive, and statistically significant relationship between prison-building and unemployment [31-33]. Results from this period demonstrate that even when prisons have negative impacts on rural communities, the impact is not as devastating as suggested by prior research. The difference in the coefficients in this analysis versus prior studies can be attributed to improvements in the quality of data, longer lagged effects, and controlling for the propensity to site a prison.

*Estimating Prison Impact in 1990*

In Table S1, I consider the relationship between prison-building from 1979–1988 and the political economy of rural towns in 1990. As in Section 4.3.1, I begin with median home values. I control for prison-building in prior periods, total population, prior decade’s unemployment, median home value, percent of residents that are in the same residence from the prior census, percent African-American, and percent Latino across all models for median home value in this table. In comparing towns in this period to those that adopted prisons in the earlier period, there is a drastic shift from prison-providing causing a boost in median home value to decreasing median home value in rural Southern towns. This pattern is statistically significant across state-level fixed-effects and propensity score models.

**Table S1.** Estimating rural property value, family income, poverty, and unemployment in 1980 as a function of recent prison-building.

| **Variables** | **Fixed-Effects Models** | | **Propensity Score Models (Kernel Matching)** | |
| --- | --- | --- | --- | --- |
| **All Rural Towns** | **Southern Rural Towns** | **All Rural Towns** | **Southern Rural Towns** |
| *Model 1* | *Model 2* | *Model 3* | *Model 4* |
| **Median Home Value ($)** | | | | |
| Prison-Building, 1969–78 | 2560 * | 3529 ** | 7615 ** | 6144 *** |
| **Median Family Income ($)** | | | | |
| Prison-Building, 1969–78 | 659 | 1233 ** | 808 | 1277 *** |
| **Poverty (%)** | | | | |
| Prison-Building, 1969–78 | –0.21 | –1.71 * | –0.77 | –2.4 * |
| **Unemployment (%)** | | | | |
| Prison-Building, 1969–78 | 0.05 | 0.04 | 0.166 | 1.25 ** |

Source: Prison Proliferation Project; **p* < 0.05; ** *p* < 0.01; *** *p* < 0.001 (two-tailed test).

While earlier adopters reaped benefits, prison-building offered little economic reprieve to towns siting prisons during this period. Overall, there is little association between prison-building and outcomes in this period. The state-level fixed-effects models suggest that prison-building may harm locals by increasing poverty by 1.67% in towns that built a prison versus towns that did not. Towns that sited a prison in this period appeared to be more economically challenged, on average, before getting a prison when compared to other rural towns. Prison-building in this period did not do much to alleviate these challenges. These findings point towards a shift in trends regarding how prison-building impacts unemployment. The move from a positive association of prisons and unemployment to a negative association is the most significant finding from the final period of the prison boom.

**Table S2.** Estimating rural property value, family income, poverty, and unemployment in 1990 as a function of recent prison-building.

| **Variables** | **Fixed-Effects Models** | | **Propensity Score Models (Kernel Matching)** | |
| --- | --- | --- | --- | --- |
| **All Rural Towns** | **Southern Rural Towns** | **All Rural Towns** | **Southern Rural Towns** |
| *Model 1* | *Model 2* | *Model 3* | *Model 4* |
| **Median Home Value ($)** | | | | |
| Prison-Building, 1979–1988 | –278 | –2487 * | 1541 | –994 * |
| **Median Family Income ($)** | | | | |
| Prison-Building, 1979–88 | –35 | –339 | 1315 * |  |
| **Poverty (%)** | | | | |
| Prison-Building, 1979–88 | 1.67* | 1.01 | 0.64 | 0.64 |
| **Unemployment (%)** | | | | |
| Prison-Building, 1979–88 | 0.62 | –0.12 | 0.64 | –0.29 |

Source: Prison Proliferation Project; **p* < 0.05;** *p* < 0.01; *** *p* < 0.001 (two-tailed test).

*Estimating Prison Impact in 2000*

The limited impact of prison-building in this period is evidenced by null effects across multiple outcomes. Because of the limited impact of prison-building in this period, I begin by discussing unemployment in Table S3. For each model, the controls for measuring unemployment include prison-building in prior periods, total population, prior decade’s unemployment, percent African-American, and percent of adults above age 25 completing a bachelor’s degree. State-level fixed-effects (Model 1) and propensity scores (Model 3) indicate that prison-building between 1989 and 1998 yielded minimal unemployment reduction in rural towns. This suggests a more protective effect of prison-building as opposed to the rise in unemployment experienced in the first period.

**Table S3.** Estimating rural property value, family income, poverty, and unemployment in 2000 as a function of recent prison-building.

| **Variables** | **Fixed-Effects Models** | | **Propensity Score Models (Kernel Matching)** | |
| --- | --- | --- | --- | --- |
| **All Rural Towns** | **Southern Rural Towns** | **All Rural Towns** | **Southern Rural Towns** |
| *Model 1* | *Model 2* | *Model 3* | *Model 4* |
| **Median Home Value ($)** | | | | |
| Prison-Building, 1989–1998 | –681 | –358 | –3571 | –3433 |
| **Median Family Income ($)** | | | | |
| Prison-Building, 1989–98 | –304 | –358 | 391 | –4044 |
| **Poverty (%)** | | | | |
| Prison-Building, 1989–98 | 0.89 | 0.94 | 1.33 | 0.64 |
| **Unemployment (%)** | | | | |
| Prison-Building, 1989–98 | –1.01 * | –0.49 * | –0.29 * | 0 * |

Source: Prison Proliferation Project; **p* < 0.05; ** *p* < 0.01; *** *p* < 0.001 (two-tailed test).

In regards to median home values, the negative trend that began in the prior period continues. Again, across all models for median home values, I control for prison-building in prior periods, total population, prior decade’s median home value, percent of residents that are in the same residence from the prior census, and percent African-American. There is no statically significant association between prison-building from 1989 to 1998 and median home value. Prison-building also has no statistical association with poverty or median family income in this period.
